# Supplementary material for: Solvent–temperature coupled hydride transfer controls product selectivity in the HSiR3/KOtBu catalytic system
Source: Royal Society of Chemistry journal article supplement (doi:10.1039/d6sc00107f), 2026-03-31
Supplement: d6sc00107f1.pdf [file d6sc00107f1.pdf]

## 1 **1. Simulation System Modeling**

2 We constructed a total of six boxes. Boxes 1 (Figure S1a), 3, and 5 simulated  
3 experimental conditions with THF solvent dilution, while boxes 2 (Figure S1b), 4, and  
4 6 simulated conditions without solvent addition. Specific details of the boxes are  
5 provided in Table S1.

6 For simulations with solution systems, the system needs to be pre-equilibrated before  
7 production. OPLS/AA force field parameters<sup>1</sup> for all molecules were generated by the  
8 LigParGen web server<sup>2</sup>. Classical molecular dynamics at 300 K, 1 bar NpT ensemble  
9 conditions were performed using the Gromacs program<sup>3</sup>. Equilibrated system  
10 configurations are required for ab initio molecular dynamics (AIMD).

11

12 **Figure S1**

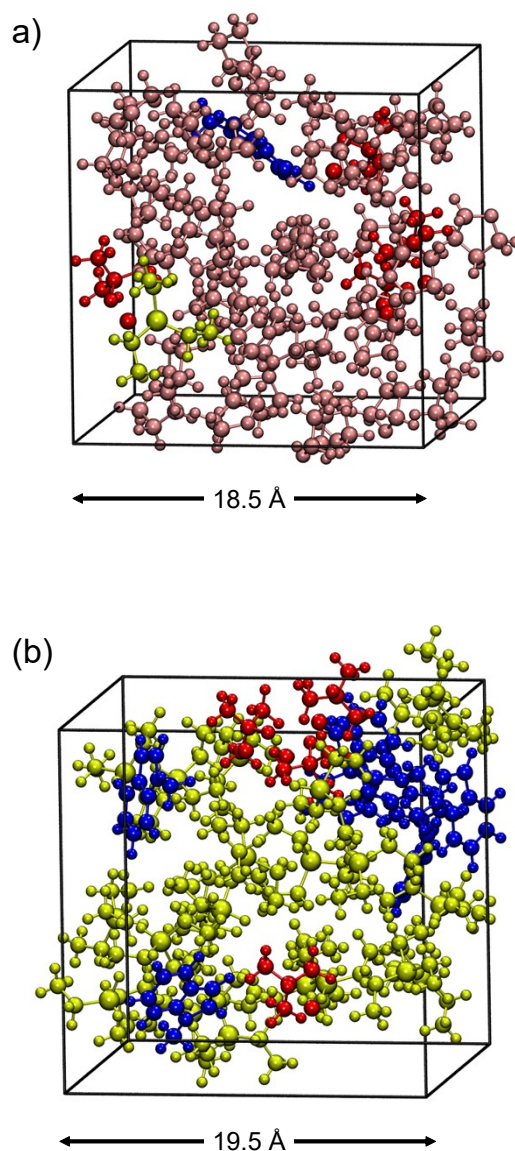

13

14 **Figure S1.** (a) and (b) Boxes of THF environment and neat environment after classical  
15 molecular dynamics equilibrium. Atoms are colored using molecular species, KOtBu in  
16 red, Et<sub>3</sub>SiH in yellow, N-methylindole in blue, and THF in pink.

17

18

19

20 **Table S1**

| No. | $N_{KO^tBu}$ | $N_{Et_3SiH}$ | $N_{N-methylindole}$ | $N_{THF}$ | Box Size (Å) |
|-----|--------------|---------------|----------------------|-----------|--------------|
| 1   | 4            | 1             | 1                    | 40        | 18.5         |
| 2   | 4            | 21            | 7                    | 0         | 19.5         |
| 3   | 4            | 1             | 1                    | 400       | 25.6         |
| 4   | 4            | 70            | 30                   | 0         | 29           |
| 5   | 4            | 1             | 1                    | 120       | 37.6         |
| 6   | 4            | 140           | 60                   | 0         | 36.4         |

21 **Table S1.** Details of the simulation box22 **2. Neural Networks Potential**

23 The machine learning molecular dynamics (MLMD) in this work were performed using  
24 a machine learning interatomic potential constructed within the Deep Potential  
25 Molecular Dynamics (DeePMD)<sup>4</sup> framework, as implemented in the DeePMD-kit  
26 package. DeePMD employs deep neural networks (DNNs) to represent high-  
27 dimensional potential energy surfaces with near first-principles accuracy while having  
28 considerable computational efficiency.

29 In the DeePMD formalism, the total potential energy of a system containing  $N$  atoms  
30 are decomposed into a sum of atomic energy contributions,

$$31 \quad E = \sum_{i=1}^N E_i,$$

32 where each atomic energy  $E_i$  depends only on the local chemical environment of atom  
33  $i$  within a finite cutoff radius. This locality assumption enables linear scaling with system  
34 size and is essential for large-scale molecular simulations.

35 To ensure translational, rotational, and permutational invariance of the potential energy  
 36 surface, the atomic coordinates are transformed into symmetry-preserving descriptors  
 37 that characterize the local environment of each atom. For atom  $i$ , descriptors are  
 38 constructed from relative position vectors  $R_{ij} = R_j - R_i$  of neighboring atoms and  
 39 expressed in a locally defined coordinate frame. Depending on the neighbor distance,  
 40 either full (radial and angular) information or radial-only information is retained. A  
 41 representative descriptor component takes the form

$$42 \quad D_{ij} = \left\{ \frac{1}{R_{ij}}, \frac{x_{ij}}{R_{ij}}, \frac{y_{ij}}{R_{ij}}, \frac{z_{ij}}{R_{ij}} \right\},$$

43 Where  $R_{ij} = |R_{ij}|$ , and  $(x_{ij}, y_{ij}, z_{ij})$  are the neighbor coordinates in the local reference  
 44 frame. Neighbors are sorted by chemical species and distance, which naturally  
 45 enforces permutational symmetry. In this work, the *se\_e2\_a* descriptor we use contains  
 46 full (radial and angular) information.

47 The atomic energy is obtained by mapping the descriptor vector  $D_i$  to a scalar value  
 48 through a feedforward deep neural network specific to the atomic species,

$$49 \quad E_i = N_{s(i)}(D_i).$$

50 The neural network consists of multiple fully connected hidden layers with nonlinear  
 51 activation functions, followed by a linear output layer. Separate networks are used for  
 52 different chemical species, allowing flexible and chemically transferable  
 53 representations.

54 Atomic forces are computed analytically as the negative gradient of the total energy  
 55 with respect to atomic positions, ensuring strict consistency between energies and  
 56 forces. The virial tensor is obtained analogously from analytical derivatives, enabling  
 57 constant-pressure simulations and stress analysis.

58 The neural network parameters are optimized by minimizing a composite loss function  
 59 that incorporates errors in energies, forces, and virials,

$$60 \quad L = \frac{p_e}{N} \Delta E^2 + \frac{p_f}{3N} \sum_i |\Delta F_i|^2 + \frac{p_\xi}{9N} \|\Delta \Xi\|^2,$$

61 where  $p_e$ ,  $p_f$ , and  $p_\xi$  are the energy, force and the virial tensor prefactors, respectively.  
 62 The optimization is carried out using the Adam stochastic gradient descent algorithm  
 63 with an exponentially decaying learning rate. The prefactor of the energy term in the  
 64 loss function was changed from 0.02 to 2, the force term from 1,000 to 1, and the virial  
 65 term from 0.01 to 1, respectively.

### 66 **3. Model Accuracy**

67 The accuracy of the trained neural network potential was validated by comparing  
68 atomic forces predicted by the model against DFT calculated forces. A validation  
69 dataset was constructed by randomly extracting configurations from simulated  
70 trajectories. The configurations in the validation set were subjected to DFT calculations  
71 using the same parameters as the computed data. The dataset is divided into three  
72 sets based on system behavior.: All validation sets, including biased and non-reactive  
73 unbiased simulation trajectories (Figure S2a); Hydride generation (Figure S2b); C2  
74 and C3 deprotonation of N-methylindole (Figure S2c); Silylation of C2 and C3 in N-  
75 methylindole (Figure S3d). The validation dataset covers all intermediates and  
76 transition states involved in the reactions studied. In total, approximately 3,000  
77 configurations were included. The mean absolute error (MAE) and root mean square  
78 error (RMSE) of atomic forces were  $0.0383 \text{ eV/\AA}$  and  $0.0570 \text{ eV/\AA}$ , respectively.  
79 Results are shown in Figure S2.

80

81 **Figure S2**

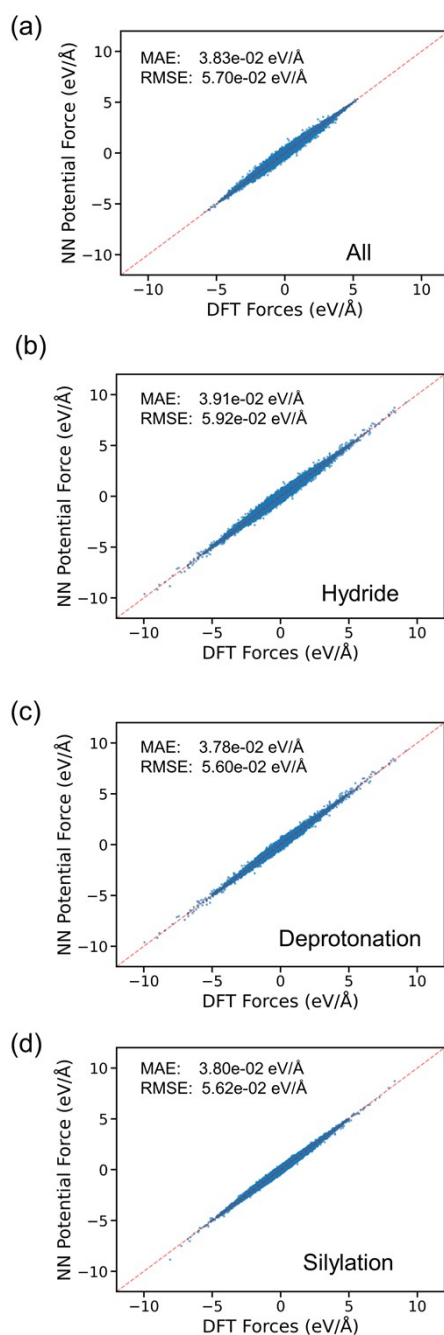

82

83 **Figure S2.** Force prediction errors of the neural network potential on the validation  
84 dataset. (a) All validation sets, including b, c and non-reactive unbiased simulation  
85 trajectories (~3000 configurations). (b) Hydride generation from the trajectory of  
86 metadynamics in Figure 1d, S2 (~1,000 configurations). (c) C2 and C3 deprotonation  
87 of N-methylindole from metadynamics trajectories of Figure 2b-c and S2 (~1,000  
88 configurations). (d) C2 and C3 silylation of N-methylindole from metadynamics  
89 trajectories of Figure S10 (~1,000 configurations).

#### 90 4. Collective Variable (CV)

91 The formula for calculating the coordination number and PATH<sup>5</sup> used is shown in Table  
92 S1. In the simulation of deprotonation reactions, we use Path Collective Variables<sup>6</sup> to  
93 define the progress of the current state in the deprotonation reaction. For example, in  
94 the C3 deprotonation reaction initial state (IS),  $C_{HH_2} \rightarrow 0$ ,  $C_{C_3H_3} \rightarrow 1$  in *s.Path*; final state  
95 (FS),  $C_{HH_2} \rightarrow 1$ ,  $C_{C_3H_3} \rightarrow 0$  in *s.Path*.

96

97 **Table S2.**

| CV [a]       | Definition                                                                                                                                                 | Parameters                                                                                                           |
|--------------|------------------------------------------------------------------------------------------------------------------------------------------------------------|----------------------------------------------------------------------------------------------------------------------|
| $C_{OO}$     | $C_{OO} = \sum_{i \in A} \sum_{j \in B} \left( \frac{r_{ij} - r_0}{r_{max} - r_0} - 1 \right)^2 \left( 1 + \frac{2(r_{ij} - r_0)}{r_{max} - r_0} \right)$  | $r_{ij}$ : distance between atoms O and O;<br>$r_0 = 4.0 \text{ \AA}$ , $r_{max} = 4.2$                              |
| $C_{SiO}$    | $C_{SiO} = \sum_{i \in A} \sum_{j \in B} \left( \frac{r_{ij} - r_0}{r_{max} - r_0} - 1 \right)^2 \left( 1 + \frac{2(r_{ij} - r_0)}{r_{max} - r_0} \right)$ | $r_{ij}$ : distance between atoms Si and O;<br>$r_0 = 1.8 \text{ \AA}$ , $r_{max} = 2.0$                             |
| $C_{HH_2}$   | $C_{HH_2} = \sum_{i \in A} \sum_{j \in B} \frac{1 - \left( \frac{r_{ij}}{r_0} \right)^n}{1 - \left( \frac{r_{ij}}{r_0} \right)^m}$                         | $r_{ij}$ : distance between atoms H and H <sub>2</sub> ;<br>$r_0 = 1.2 \text{ \AA}$ , $m = 6$ , $n = 8$              |
| $C_{HH_3}$   | $C_{HH_3} = \sum_{i \in A} \sum_{j \in B} \frac{1 - \left( \frac{r_{ij}}{r_0} \right)^n}{1 - \left( \frac{r_{ij}}{r_0} \right)^m}$                         | $r_{ij}$ : distance between atoms H and H <sub>3</sub> ;<br>$r_0 = 1.2 \text{ \AA}$ , $m = 6$ , $n = 8$              |
| $C_{KH}$     | $C_{KH} = \sum_{i \in A} \sum_{j \in B} \left( \frac{r_{ij} - r_0}{r_{max} - r_0} - 1 \right)^2 \left( 1 + \frac{2(r_{ij} - r_0)}{r_{max} - r_0} \right)$  | $r_{ij}$ : distance between atoms K and H;<br>$r_0 = 2.8 \text{ \AA}$ , $r_{max} = 3.2$                              |
| $C_{C_2H_2}$ | $C_{C_2H_2} = \sum_{i \in A} \sum_{j \in B} \frac{1 - \left( \frac{r_{ij}}{r_0} \right)^n}{1 - \left( \frac{r_{ij}}{r_0} \right)^m}$                       | $r_{ij}$ : distance between atoms C <sub>2</sub> and H <sub>2</sub> ;<br>$r_0 = 1.2 \text{ \AA}$ , $m = 6$ , $n = 8$ |
| $C_{C_3H_3}$ | $C_{C_3H_3} = \sum_{i \in A} \sum_{j \in B} \frac{1 - \left( \frac{r_{ij}}{r_0} \right)^n}{1 - \left( \frac{r_{ij}}{r_0} \right)^m}$                       | $r_{ij}$ : distance between atoms C <sub>3</sub> and H <sub>3</sub> ;<br>$r_0 = 1.2 \text{ \AA}$ , $m = 6$ , $n = 8$ |

$$s.Path = \frac{\sum_{i=1}^N i \exp(-\lambda R[X - X_i])}{\sum_{i=1}^N \exp(-\lambda R[X - X_i])}$$

$X: C_{HH_2}(\text{or } C_{HH_3})$  and  
 $C_{C_2H_2}$  (or  $C_{C_3H_3}$ );  $\lambda = 4$

$$z.Path = -\frac{1}{\lambda} \ln \left[ \sum_{i=1}^N i \exp(-\lambda R[X - X_i]) \right]$$

$X: C_{HH_2}(\text{or } C_{HH_3})$  and  
 $C_{C_2H_2}$  (or  $C_{C_3H_3}$ );  $\lambda = 4$

98 [a] Specific objects referred to here by individual atoms: H<sub>2</sub>, C<sub>2</sub>, H<sub>3</sub>, C<sub>3</sub> represent the H and C atoms at the

99 C2 and C3 positions of the N-methylindole; H represents hydride.

100 **Table S2.** CVs used in the simulation and their definitions.

## 101 5. Convergence of the Metadynamics Simulations

102 **Figure S3**

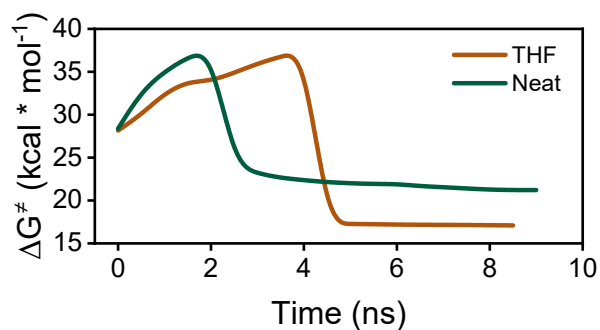

103

104 **Figure S3.** Convergence trend of free energy barriers over time in the main text Figure

105 2d.

106

107

108

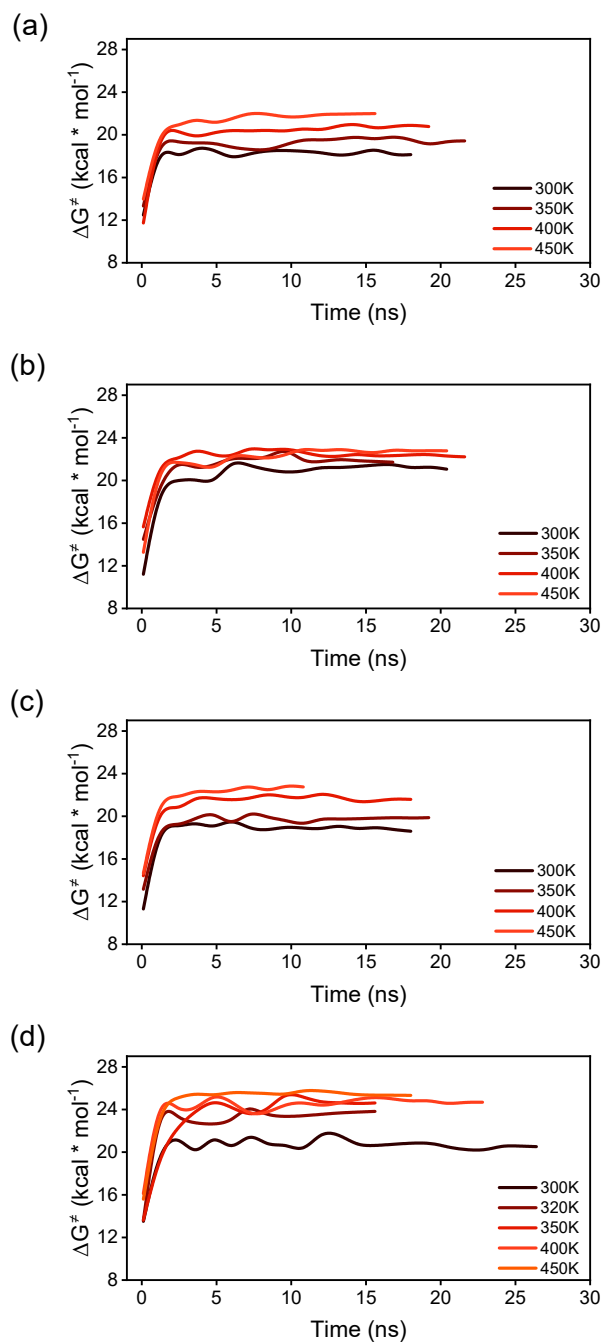

110

111 **Figure S4.** (a-d) Convergence trend of free energy barriers over time in the main text

112 Figure 3c-d.

113 **6. Simulation Results**

114 **Figure S5**

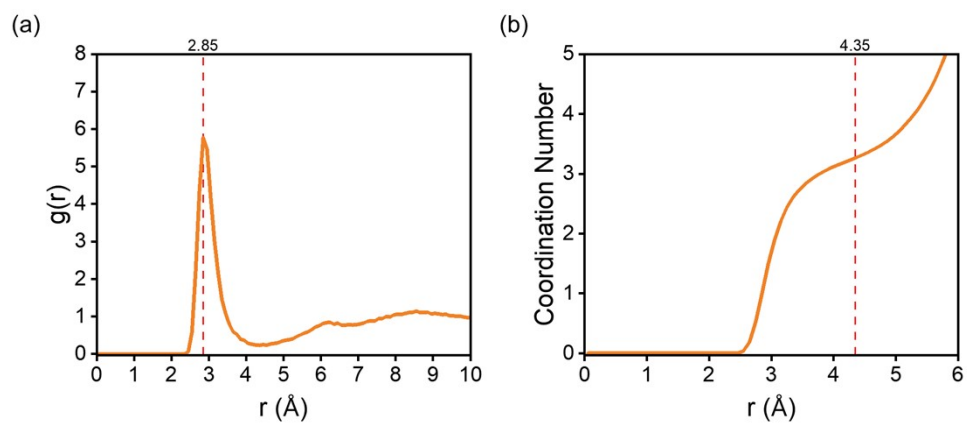

115

116 **Figure S5.** (a) and (b) At 300K in a THF environment, the RDF of potassium ions from  
117 the KO<sup>t</sup>Bu catalyst with O atoms in THF and its integral in the first shell region (average  
118 coordination number).

119

120 **Figure S6**

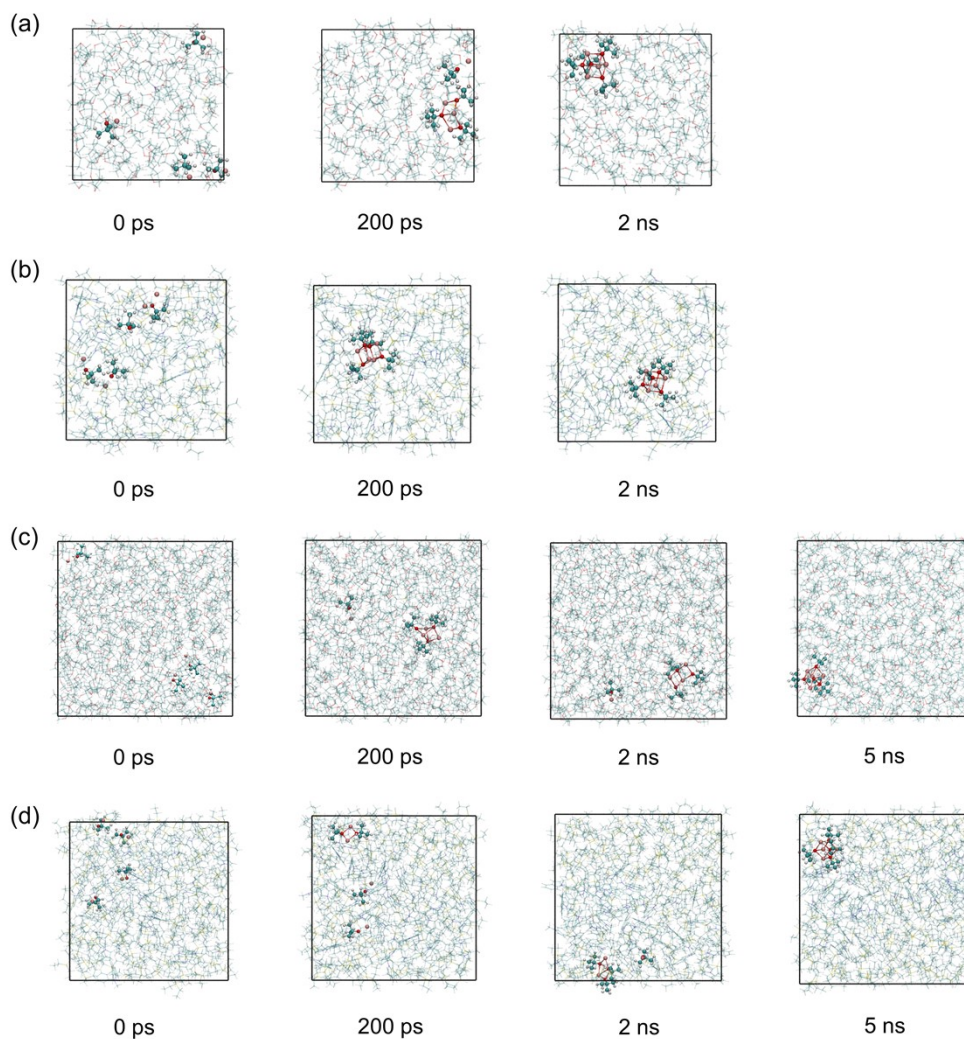

121

122 **Figure S6.** Expanded unbiased simulation snapshots at 0 ps, 200 ps, 2 ns, and 5 ns,  
123 highlighting KO<sup>t</sup>Bu molecules. a, b, c, d correspond to boxes 3, 4, 5, and 6 in Table  
124 S1.

125

126

127 **Figure S7**

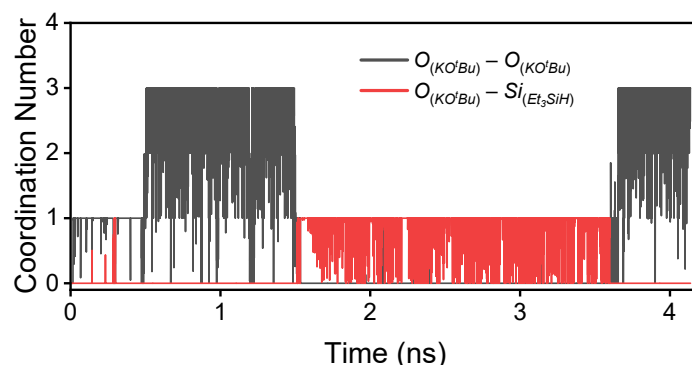

128

129 **Figure S7.** The mutual coordination number of O atoms in KO<sup>t</sup>Bu molecules, and the  
130 coordination number of oxygen atoms in KO<sup>t</sup>Bu with Si atoms in Et<sub>3</sub>SiH molecules over  
131 time.

132 **Figure S8**

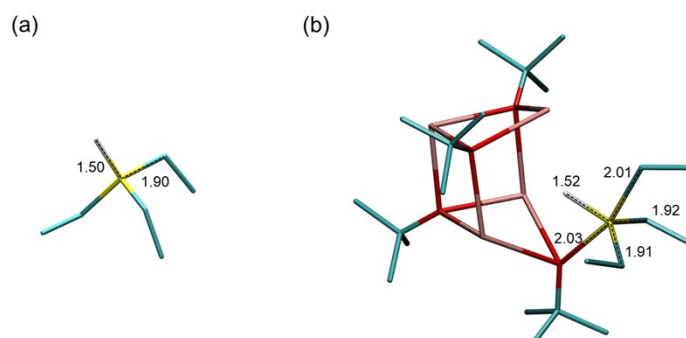

133

134 **Figure S8.** Structures of Et<sub>3</sub>SiH and pentacoordinate silicon captured in simulations,  
135 with H atoms on C atoms hidden. Geometry optimization performed using the  
136 Gaussian 16 program<sup>7</sup> at the B3LYP/6-31G(d) level of theory.

137

138 The simulations show that the polymerization of KO<sup>t</sup>Bu always takes precedence over  
139 the hydride generation process. That is, in all simulations, the hydride is generated  
140 under the catalytic influence of KO<sup>t</sup>Bu clusters. To highlight the difference between a  
141 single KO<sup>t</sup>Bu catalyst and KO<sup>t</sup>Bu clusters, we simulated the hydride production  
142 process in a box containing one KO<sup>t</sup>Bu and a box containing four KO<sup>t</sup>Bu, respectively,  
143 with the simulation and enhancement sampling setups consistent with Figures 2a-b.  
144 The results show that free the hydride has almost no lifetime in a single catalyst

145 environment and that individual potassium ions have no temperature hydride capability  
146 (Figure 4a). In contrast, in catalyst clusters, the hydride relies on the electrostatic  
147 interaction of multiple potassium ions and can be stabilized (Figure 4b).

148 **Figure S9**

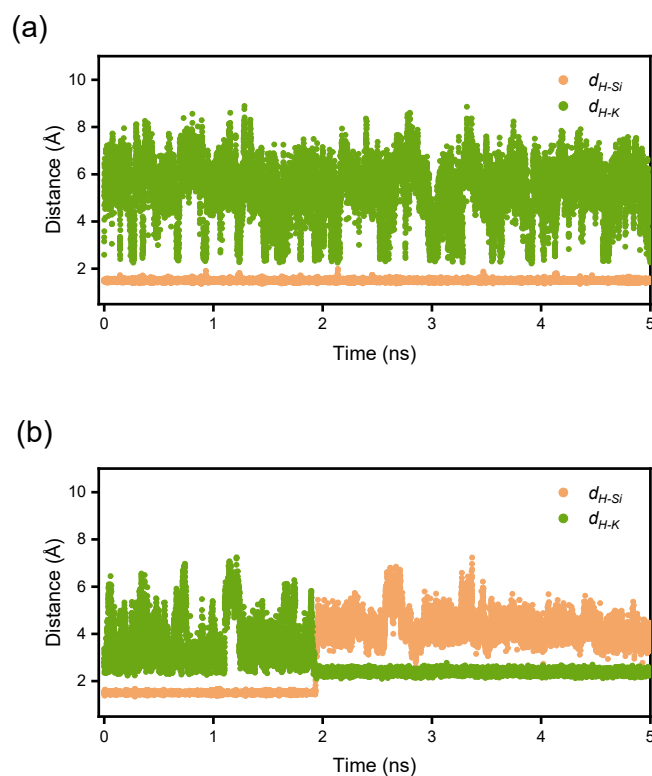

149

150 **Figure S9.** Distance of the Si-H bond in  $Et_3SiH$ , and the distance of silicon hydrogen  
151 from the nearest  $K^+$  ion with time. (a) single catalyst system; (b) four catalyst systems

152

153 **Figure S10**

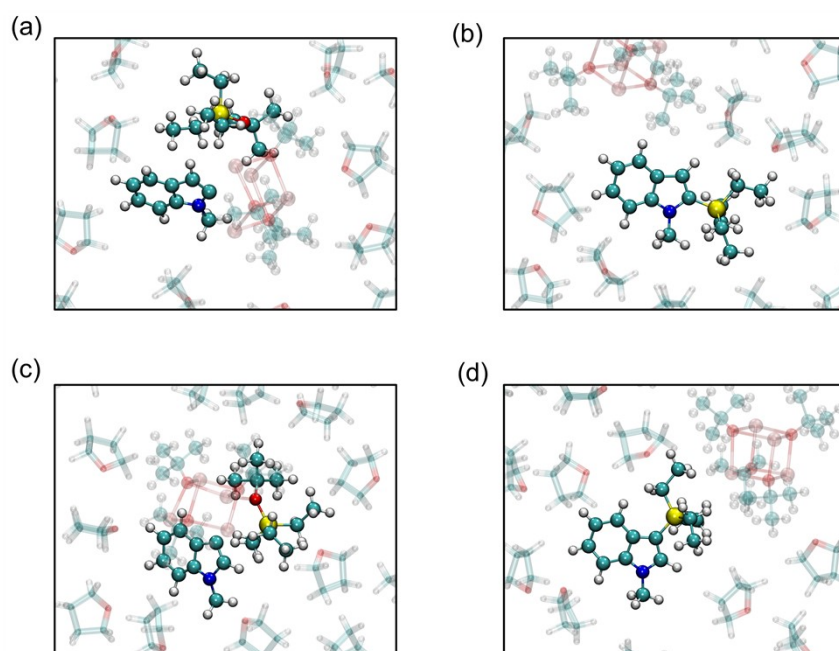

154

155 **Figure S10.** Snapshots of N-methylindole silylation extracted from trajectories. a, b:  
156 IS (initial state) and FS (final state) snapshots of 2-indole anion silylation. c, d:  
157 IS and FS snapshots of 3-indole anion silylation.

158

159

160

161 **Figure S11**

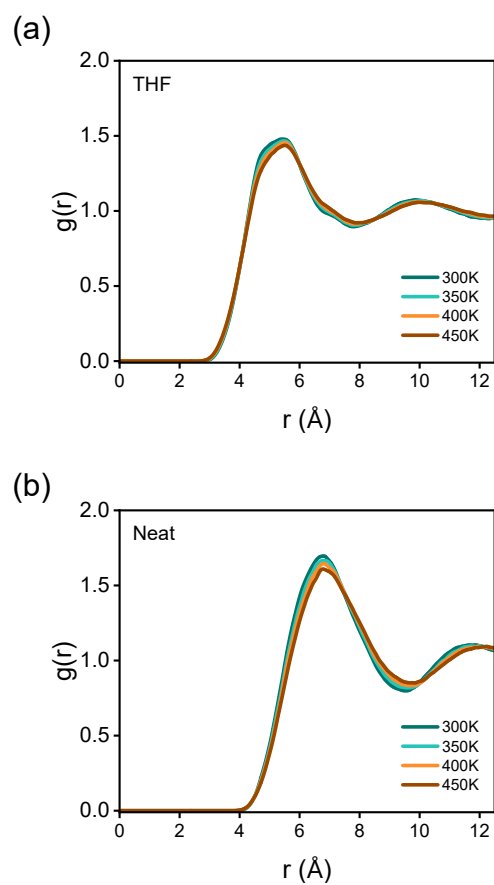

162

163 **Figure S11.** Radial distribution function (RDF) of the solvent counted in the trajectory  
164 of the deprotonation reaction simulation. (a) RDF of THF molecules in THF  
165 environment; (b) RDF of Et<sub>3</sub>SiH molecules in neat environment.

166

167

## 168 REFERENCES

- 169 1. W. L. Jorgensen and J. Tirado-Rives, Potential energy functions for atomic-level  
170 simulations of water and organic and biomolecular systems, *Proceedings of the*  
171 *National Academy of Sciences*, 2005, **102**, 6665-6670.
- 172 2. L. S. Dodda, I. Cabeza de Vaca, J. Tirado-Rives and W. L. Jorgensen, LigParGen  
173 web server: an automatic OPLS-AA parameter generator for organic ligands, *Nucleic*  
174 *Acids Research*, 2017, **45**, W331-W336.
- 175 3. M. J. Abraham, T. Murtola, R. Schulz, S. Páll, J. C. Smith, B. Hess and E. Lindahl,  
176 GROMACS: High performance molecular simulations through multi-level  
177 parallelism from laptops to supercomputers, *SoftwareX*, 2015, **1-2**, 19-25.
- 178 4. J. Zeng, D. Zhang, D. Lu, P. Mo, Z. Li, Y. Chen, M. Rynik, L. a. Huang, Z. Li, S. Shi,  
179 Y. Wang, H. Ye, P. Tuo, J. Yang, Y. Ding, Y. Li, D. Tisi, Q. Zeng, H. Bao, Y. Xia, J.  
180 Huang, K. Muraoka, Y. Wang, J. Chang, F. Yuan, S. L. Bore, C. Cai, Y. Lin, B.  
181 Wang, J. Xu, J.-X. Zhu, C. Luo, Y. Zhang, R. E. A. Goodall, W. Liang, A. K. Singh,  
182 S. Yao, J. Zhang, R. Wentzcovitch, J. Han, J. Liu, W. Jia, D. M. York, W. E. R. Car,  
183 L. Zhang and H. Wang, DeePMD-kit v2: A software package for deep potential  
184 models, *The Journal of Chemical Physics*, 2023, **159**, 054801.
- 185 5. D. Branduardi, F. L. Gervasio and M. Parrinello, From A to B in free energy space,  
186 *The Journal of Chemical Physics*, 2007, **126**, 054103.
- 187 6. L. Hovan, F. Comitani and F. L. Gervasio, Defining an Optimal Metric for the Path  
188 Collective Variables, *Journal of Chemical Theory and Computation*, 2019, **15**, 25-32.
- 189 7. M. J. Frisch, G. W. Trucks, H. B. Schlegel, G. E. Scuseria, M. A. Robb, J. R.  
190 Cheeseman, G. Scalmani, V. Barone, G. A. Petersson, H. Nakatsuji, X. Li, M.  
191 Caricato, A. V. Marenich, J. Bloino, B. G. Janesko, R. Gomperts, B. Mennucci, H. P.  
192 Hratchian, J. V. Ortiz, A. F. Izmaylov, J. L. Sonnenberg, Williams, F. Ding, F.  
193 Lipparini, F. Egidi, J. Goings, B. Peng, A. Petrone, T. Henderson, D. Ranasinghe, V.  
194 G. Zakrzewski, J. Gao, N. Rega, G. Zheng, W. Liang, M. Hada, M. Ehara, K. Toyota,  
195 R. Fukuda, J. Hasegawa, M. Ishida, T. Nakajima, Y. Honda, O. Kitao, H. Nakai, T.  
196 Vreven, K. Throssell, J. A. Montgomery Jr., J. E. Peralta, F. Ogliaro, M. J. Bearpark,  
197 J. J. Heyd, E. N. Brothers, K. N. Kudin, V. N. Staroverov, T. A. Keith, R. Kobayashi,  
198 J. Normand, K. Raghavachari, A. P. Rendell, J. C. Burant, S. S. Iyengar, J. Tomasi,  
199 M. Cossi, J. M. Millam, M. Klene, C. Adamo, R. Cammi, J. W. Ochterski, R. L.  
200 Martin, K. Morokuma, O. Farkas, J. B. Foresman and D. J. Fox, Gaussian 16 Rev.  
201 C.01. *Journal*, 2016.

202
